# Supplementary material
Source: publisher figshare collection journal article supplement (https://sage.figshare.com/ndownloader/files/14376038)
Supplement: Supplementary file 1 [file 14376038]

### **Appendix 3: Cochrane Risk of Bias Tools of RCTs**

[illegible]

[illegible]
